# Supplementary material
Source: Springer Nature journal article supplement (https://www.springermedizin.de/resource/supplementary/12990_2013_626_MOESM1_ESM.pdf/9612232)

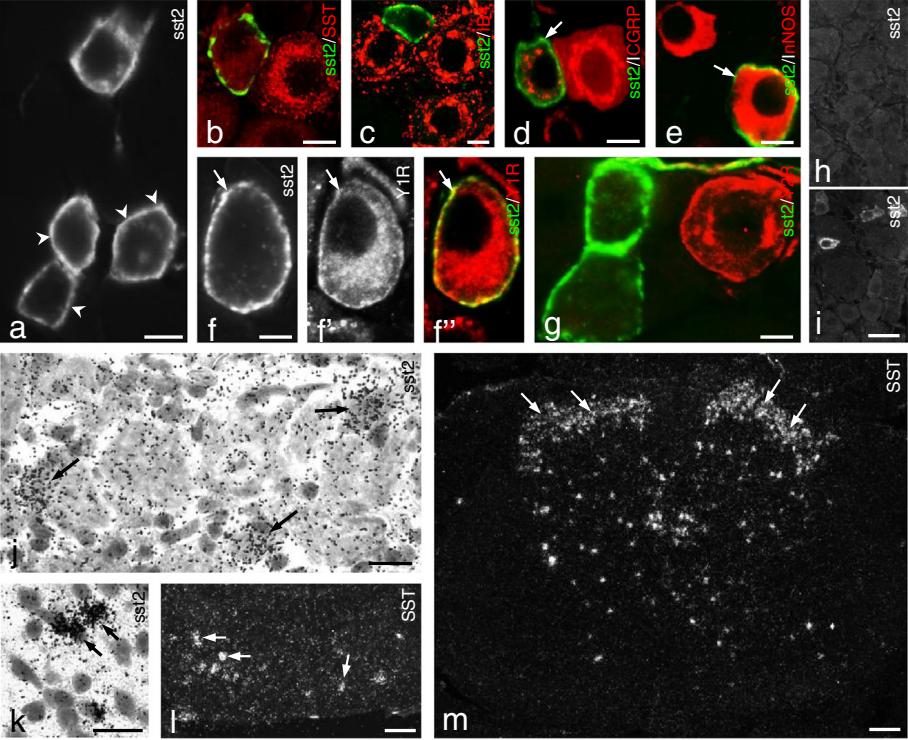

Supplement: MOESM1 [file 9612232]
